# Supplementary material for: Profile of Stilbenes and Other Phenolics in Fanagoria White and Red Russian Wines
Source: PubMed Central journal article supplement (PMC8070200; doi:10.3390/metabo11040231), 2021-04-09
Supplement: metabolites-11-00231-s001.pdf [file metabolites-11-00231-s001.pdf]

Supplementary material for Suprun et al. "Stilbene and other phenolic compounds profile in Russian Fanagoria white and red wines", *Metabolites*, 2021.

**Table S1.** The bottling date, nutritional value, alcohol, carbohydrates, sugars in the white and red Russian Fanagoria wines.

| White wine and vintage                    | Bottling date | Nutritional value (100 ml, kJ) | Alcohol, % | Carbohydrates per 100 ml/g | Sugars, g/l |
|-------------------------------------------|---------------|--------------------------------|------------|----------------------------|-------------|
| Fanagoria CHARDONNAY, 2017                | 22.09.2018    | 390                            | 12-14      | n.i.                       | no          |
| Fanagoria Riesling, 2017 (NR)             | 11.10.2018    | 310                            | 12         | 1.3                        | 13          |
| Fanagoria Riesling, 2017 (FS)             | 08.10.2018    | 410                            | 11-13      | 3.5                        | 25-35       |
| Fanagoria Sauvignon, 2017                 | 08.10.2018    | 390                            | 14         | n.i.                       | no          |
| Fanagoria Shardone semi-sweet white, 2017 | 29.06.2018    | 410                            | 11-13      | 3.5                        | 25-35       |
| Fanagoria Muscat semi-sweet, 2017         | 07.11.2018    | 340                            | 11         | 3.5                        | 25-35       |
| Fanagoria White semi-sweet, 2017          | 10.09.2018    | 410                            | 11-13      | 3.5                        | 25-35       |
| Red wine and vintage                      |               |                                |            |                            |             |
| Fanagoria Author's #1, 2017               | 23.03.2018    | 410                            | 13.5       | n.i.                       | no          |
| Fanagoria Cabernet, 2017                  | 19.09.2018    | 320                            | 12-14      | n.i.                       | no          |
| Fanagoria Cabernet-Saperavi, 2017         | 22.09.2018    | 320                            | 13         | n.i.                       | no          |
| Fanagoria Cahors Canonical, 2017          | 19.10.2018    | 400                            | 10.5       | 5                          | 50          |
| Fanagoria Merlot semi-sweet, 2017         | 27.11.2018    | 320                            | 12-14      | 3.5                        | 25-35       |
| Fanagoria Merlot (NR), 2017               | 02.10.2018    | 340                            | 11-13      | n.i.                       | no          |
| Fanagoria Merlot (FS), 2017               | 25.10.2018    | 340                            | 13         | n.i.                       | no          |
| Fanagoria Red semi-sweet, 2017            | 18.09.2018    | 340                            | 11-13      | 3.5                        | 25-35       |
| Fanagoria Saperavi, 2017                  | 27.08.2018    | 390                            | 12-14      | n.i.                       | no          |
| Fanagoria Saperavi semi-sweet, 2017       | 16.10.2018    | 340                            | 11-13      | 3.5                        | 25-35       |
| Fanagoria Tsimlyansky black, 2017         | 13.09.2018    | 380                            | 12.5       | n.i.                       | no          |

n.i. – no information. The information was taken from the wine labels provided by the manufacturer.

**Table S2.** The content of phenolic acids and flavonols in the white Russian Fanogoria wines (mg/L).

| White wine and vintage                    | a                            | b                             | c                             | d                            | e                             | f              | g                             | h                             | i                            | q              | k              | l              | m                            | n              |
|-------------------------------------------|------------------------------|-------------------------------|-------------------------------|------------------------------|-------------------------------|----------------|-------------------------------|-------------------------------|------------------------------|----------------|----------------|----------------|------------------------------|----------------|
| Fanogoria CHARDONNAY, 2017                | 1.451<br>±0.082 <sup>a</sup> | 3.892<br>±0.177 <sup>d</sup>  | 3.310<br>±0.185 <sup>cd</sup> | 0.519<br>±0.080 <sup>c</sup> | 4.985<br>±0.215 <sup>b</sup>  | 0 <sup>a</sup> | 3.320<br>±0.156 <sup>a</sup>  | 2.011<br>±0.177 <sup>a</sup>  | 0.253<br>±0.037 <sup>e</sup> | 0 <sup>a</sup> | 0 <sup>a</sup> | 0 <sup>a</sup> | 0 <sup>b</sup>               | 0 <sup>a</sup> |
| Fanogoria Riesling, 2017 (NR)             | 0 <sup>c</sup>               | 18.745<br>±0.605 <sup>a</sup> | 6.110<br>±0.243 <sup>b</sup>  | 2.511<br>±0.116 <sup>a</sup> | 3.502<br>±0.153 <sup>c</sup>  | 0 <sup>a</sup> | 1.005<br>±0.075 <sup>d</sup>  | 1.252<br>±0.122 <sup>b</sup>  | 1.791<br>±0.116 <sup>b</sup> | 0 <sup>a</sup> | 0 <sup>a</sup> | 0 <sup>a</sup> | 0 <sup>b</sup>               | 0 <sup>a</sup> |
| Fanogoria Riesling, 2017 (FS)             | 0 <sup>c</sup>               | 20.645<br>±0.805 <sup>a</sup> | 6.335<br>±0.505 <sup>b</sup>  | 2.888<br>±0.093 <sup>a</sup> | 6.970<br>±0.89 <sup>a</sup>   | 0 <sup>a</sup> | 2.242<br>±0.384 <sup>b</sup>  | 1.970<br>±0.326 <sup>ab</sup> | 2.825<br>±0.585 <sup>a</sup> | 0 <sup>a</sup> | 0 <sup>a</sup> | 0 <sup>a</sup> | 0 <sup>b</sup>               | 0 <sup>a</sup> |
| Fanogoria Sauvignon, 2017                 | 1.185<br>±0.035 <sup>a</sup> | 1.585<br>±0.055               | 1.758<br>±0.243 <sup>e</sup>  | 0.395<br>±0.015 <sup>c</sup> | 1.705<br>±0.015 <sup>d</sup>  | 0 <sup>a</sup> | 0.935<br>±0.035 <sup>d</sup>  | 0.815<br>±0.025 <sup>c</sup>  | 0.122<br>±0.017 <sup>f</sup> | 0 <sup>a</sup> | 0 <sup>a</sup> | 0 <sup>a</sup> | 0 <sup>b</sup>               | 0 <sup>a</sup> |
| Fanogoria Shardone semi-sweet white, 2017 | 0 <sup>c</sup>               | 4.891<br>±0.165 <sup>c</sup>  | 2.590<br>±0.091 <sup>de</sup> | 0.625<br>±0.035 <sup>c</sup> | 2.831<br>±0.354 <sup>cd</sup> | 0 <sup>a</sup> | 2.185<br>±0.225 <sup>b</sup>  | 0.857<br>±0.130 <sup>c</sup>  | 0.435<br>±0.035 <sup>d</sup> | 0 <sup>a</sup> | 0 <sup>a</sup> | 0 <sup>a</sup> | 0 <sup>b</sup>               | 0 <sup>a</sup> |
| Fanogoria Muscat semi-sweet, 2017         | 0 <sup>c</sup>               | 21.335<br>±1.255 <sup>a</sup> | 10.575<br>±0.775 <sup>a</sup> | 1.288<br>±0.114 <sup>b</sup> | 3.525<br>±0.135 <sup>c</sup>  | 0 <sup>a</sup> | 1.935<br>±0.025 <sup>c</sup>  | 0.845<br>±0.065 <sup>c</sup>  | 1.785<br>±0.225 <sup>b</sup> | 0 <sup>a</sup> | 0 <sup>a</sup> | 0 <sup>a</sup> | 0 <sup>b</sup>               | 0 <sup>a</sup> |
| Fanogoria White semi-sweet, 2017          | 0.130<br>±0.028 <sup>b</sup> | 7.715<br>±0.125 <sup>b</sup>  | 4.025<br>±0.045 <sup>c</sup>  | 1.161<br>±0.088 <sup>b</sup> | 3.903<br>±0.177 <sup>c</sup>  | 0 <sup>a</sup> | 2.745<br>±0.095 <sup>ab</sup> | 0.789<br>±0.047 <sup>c</sup>  | 0.77<br>±0.03 <sup>c</sup>   | 0 <sup>a</sup> | 0 <sup>a</sup> | 0 <sup>a</sup> | 0.241<br>±0.030 <sup>a</sup> | 0 <sup>a</sup> |

a) gallic acid, b) caftaric acid, c) coumaric acid, d) caffeic acid, e) ferulic acid, f) myricetin-3-O-glucoside, g) p-coumaric acid, h) hexose ester of protocatechuic acid, i) dihydroquercetin-3-O-rhamnoside, q) quercetin-3-O-glucoside, k) quercetin-3-O-glucuronide, l) myricetin, m) quercetin, n) kaempferol. <sup>a</sup>Means followed by *the same letter* were not different using Student's *t* test; NR - Nomernoy Reserve or Licence Stockpile. The measurement for each wine variety was repeated 3 times, samples were taken from different bottles. *P* < 0.05 was considered statistically significant (for columns).

**Table S3.** The content of phenolic acids and flavonols in the red Russian Fanagoria wines (mg/L).

| Red wine and vintage                                                   | a               | b                | c                | d               | e                | f                | g   | h | i | q                | k               | l                | m                | n               |
|------------------------------------------------------------------------|-----------------|------------------|------------------|-----------------|------------------|------------------|-----|---|---|------------------|-----------------|------------------|------------------|-----------------|
| Fanagoria Author's #1, 2017                                            | tr.             | 74.615<br>±0.935 | 68.825<br>±1.605 | 0.525<br>±0.055 | 9.875<br>±0.395  | 48.635<br>±2.825 | tr. | 0 | 0 | 30.513<br>±1.663 | 2.318<br>±0.043 | 8.252<br>±0.257  | 7.571<br>±0.360  | 1.382<br>±0.239 |
| Fanagoria Cabernet, 2017                                               | 4.615<br>±0.275 | 15.195<br>±0.435 | 10.489<br>±0.637 | 1.655<br>±0.125 | 9.377<br>±0.335  | 40.969<br>±3.239 | tr. | 0 | 0 | 11.465<br>±0.775 | 3.475<br>±0.275 | 10.915<br>±0.515 | 6.622<br>±0.584  | 2.705<br>±0.115 |
| Fanagoria Cabernet-Saperavi, 2017                                      | 3.765<br>±0.065 | 12.670<br>±0.055 | 8.345<br>±0.485  | 1.315<br>±0.118 | 16.415<br>±0.185 | 79.191<br>±1.632 | tr. | 0 | 0 | 16.822<br>±1.997 | 5.865<br>±0.535 | 27.645<br>±0.855 | 8.835<br>±0.295  | 3.704<br>±0.143 |
| Fanagoria Cahors Canonical, 2016 (1957)                                | 4.921<br>±0.054 | 92.082<br>±1.443 | 8.645<br>±0.395  | 1.395<br>±0.155 | 4.577<br>±0.509  | 43.025<br>±1.375 | tr. | 0 | 0 | 4.705<br>±0.385  | 1.785<br>±0.135 | 10.622<br>±0.427 | 4.031<br>±0.134  | 1.964<br>±0.186 |
| Fanagoria Cahors Canonical, 2017 (Cahors)                              | 5.685<br>±0.145 | 23.825<br>±0.415 | 20.71<br>±2.054  | 1.675<br>±0.525 | 4.681±<br>0.047  | 36.737<br>±4.754 | tr. | 0 | 0 | 11.560<br>±0.872 | 3.155<br>±0.095 | 8.175<br>±0.385  | 4.442<br>±0.296  | 2.065<br>±0.075 |
| Fanagoria Merlot semi-sweet, 2017                                      | 5.368<br>±0.093 | 21.151<br>±0.678 | 14.58<br>±0.173  | 1.848<br>±0.056 | 8.085<br>±0.255  | 52.505<br>±1.053 | tr. | 0 | 0 | 17.715<br>±0.365 | 4.845<br>±0.065 | 18.275<br>±3.265 | 12.660<br>±0.082 | 2.235<br>±0.195 |
| Fanagoria Merlot, 2016 (NR)                                            | 6.419<br>±0.295 | 14.358<br>±0.037 | 8.920<br>±0.145  | 0.633<br>±0.048 | 10.565<br>±0.335 | 51.970<br>±0.782 | tr. | 0 | 0 | 16.035<br>±0.275 | 4.329<br>±0.243 | 11.515<br>±0.425 | 10.302<br>±0.325 | 1.997<br>±0.129 |
| Fanagoria Merlot, 2016, after six months, storage in dark, +10 °C (NR) | 5.983<br>±0.571 | 12.991<br>±0.274 | 8.023<br>±0.662  | 0.604<br>±0.136 | 7.922<br>±0.298  | 40.065<br>±1.015 | tr. | 0 | 0 | 7.825<br>±0.115  | 8.954<br>±0.036 | 14.170<br>±0.376 | 4.545<br>±0.175  | 1.901<br>±0.298 |
| Fanagoria Merlot (NR), 2017                                            | 6.645<br>±0.055 | 14.747<br>±0.333 | 8.13<br>±0.567   | tr.             | 15.385<br>±0.245 | 55.435<br>±1.385 | tr. | 0 | 0 | 13.131<br>±0.161 | 3.945<br>±0.125 | 17.176<br>±0.762 | 4.158<br>±0.272  | 0.812<br>±0.122 |
| Fanagoria Merlot (FS), 2017                                            | 4.981<br>±0.150 | 20.582<br>±0.538 | 10.165<br>±0.575 | tr.             | 4.445<br>±0.065  | 48.342<br>±1.614 | tr. | 0 | 0 | 17.840<br>±0.725 | 4.515<br>±0.085 | 26.115<br>±0.595 | 15.975<br>±0.355 | 4.361<br>±0.224 |
| Fanagoria Red semi-sweet, 2017                                         | 5.260<br>±0.097 | 25.910<br>±0.982 | 18.145<br>±0.465 | 2.040<br>±0.174 | 4.655<br>±0.455  | 39.310<br>±1.082 | tr. | 0 | 0 | 11.775<br>±0.225 | 4.251<br>±0.033 | 16.878<br>±1.834 | 7.072<br>±0.039  | 1.645<br>±0.085 |
| Fanagoria Saperavi, 2017                                               | 5.855<br>±0.215 | 15.205<br>±0.975 | 6.16<br>±3.531   | 1.103<br>±0.042 | 7.172<br>±0.15   | 54.451<br>±5.547 | tr. | 0 | 0 | 11.645<br>±0.355 | 3.332<br>±0.225 | 7.821<br>±0.175  | 6.585<br>±0.115  | 2.431<br>±0.023 |
| Fanagoria Saperavi semi-sweet, 2016 (1957)                             | 6.051<br>±0.131 | 14.025<br>±0.415 | 10.721<br>±0.546 | 1.305<br>±0.185 | 7.275<br>±0.175  | 47.461<br>±0.685 | tr. | 0 | 0 | 8.183<br>±0.377  | 2.285<br>±0.135 | 5.885<br>±0.258  | 1.811<br>±0.177  | 0.385<br>±0.115 |
| Fanagoria Saperavi semi-sweet, 2017 (1957)                             | 6.047<br>±0.12  | 14.541<br>±0.453 | 10.973<br>±0.506 | 1.211<br>±0.097 | 7.573<br>±0.304  | 47.047<br>±0.866 | tr. | 0 | 0 | 8.947<br>±0.209  | 2.343<br>±0.186 | 6.473<br>±0.293  | 2.737<br>±0.449  | 0.493<br>±0.047 |
| Fanagoria Tsimlyansky black, 2016 (NR)                                 | 6.405<br>±0.075 | 17.380<br>±0.493 | 4.225<br>±0.035  | 1.712<br>±0.244 | 12.631<br>±0.177 | 48.551<br>±0.295 | tr. | 0 | 0 | 7.825<br>±0.215  | 2.951<br>±0.057 | 14.168<br>±1.373 | 4.545<br>±0.145  | 2.008<br>±0.397 |
| Fanagoria Tsimlyansky black, 2017 (NR)                                 | 3.831<br>±0.128 | 25.475<br>±1.535 | 5.535<br>±0.035  | 2.125<br>±0.505 | 10.485<br>±0.454 | 65.015<br>±0.415 | tr. | 0 | 0 | 11.005<br>±0.995 | 5.210<br>±0.996 | 26.175<br>±1.725 | 4.505<br>±0.125  | 1.831<br>±0.215 |

a) gallic acid, b) caftaric acid, c) coumaric acid, d) caffeic acid, e) ferulic acid, f) myricetin-3-O-glucoside, g) p-coumaric acid, h) hexose ester of protocatechuic acid, i) dihydroquercetin-3-O-rhamnoside, q) quercetin-3-O-glucoside, k) quercetin-3-O-glucuronide, l) myricetin, m) quercetin, n) kaempferol. The measurement for each wine variety was repeated 3 times, samples were taken from different bottles.  $P < 0.05$  was considered statistically significant (for columns); tr. - trace.

**Table S4.** List of the phenolic compounds from wine extracts

| Peak* | Name                                | Rt (min) | UV, $\lambda_{\text{max}}$ (nm) | Moll mass (g/M) | (M-H) <sup>-</sup> (m/z) | MS <sup>2</sup> fragments (m/z) |
|-------|-------------------------------------|----------|---------------------------------|-----------------|--------------------------|---------------------------------|
| 1     | <i>trans</i> -piceid                | 20.6     | 310                             | 390.388         | 227                      | 100                             |
| 2     | <i>trans</i> -piceatanno            | 22.6     | 320                             | 244.246         | 243                      | 225                             |
| 3     | <i>cis</i> -piceid                  | 23.9     | 290                             | 228.25          | 227                      | 100                             |
| 4     | <i>trans</i> -resveratrol           | 29.5     | 310                             | 228.25          | 227                      | 185                             |
| 5     | <i>cis</i> -resveratrol             | 29.5     | 290                             | 390.4           | 227                      | 185                             |
| 6     | $\delta$ -viniferin                 | 35.4     | 320                             | 454.48          | 453                      | 359,347                         |
| a     | Gallic acid                         | 7.8      | 270                             | 170.12          | 169                      | 125                             |
| b     | Caftaric acid                       | 11.8     | 330                             | 312.229         | 311                      | 149,179                         |
| c     | Coutaric acid                       | 14       | 310                             | 296.231         | 295                      | 163                             |
| d     | Caffeic acid                        | 15.5     | 320                             | 180.16          | 179                      | 135                             |
| e     | Fertaric acid                       | 15.8     | 320                             | 326.25          | 325                      | 193                             |
| f     | Myricetin-3-O-glucoside             | 21.1     | 360                             | 480.4           | 479                      | 317,179,151                     |
| g     | p-Coumaric acid                     | 19.3     | 310                             | 164.047         | 163                      | 119                             |
| h     | Hexose ester of protocatechuic acid | 21.1     | 280                             | 450.4           | 315                      | 153                             |
| i     | Dihydroquercetin-3-O-rhamnoside     | 21.5     | 360                             | 448.4           | 449                      | 285,303                         |
| j     | Quercetin-3-O-glucoside             | 19.2     | 360                             | 464.4           | 463                      | 301                             |
| k     | Quercetin-3-O-glucuronide           | 21.2     | 360                             | 478.1           | 477                      | 301                             |
| l     | Myricetin                           | 24.8     | 360                             | 318.23          | 317                      | nd                              |
| m     | Quercetin                           | 29.1     | 360                             | 302.236         | 301                      | nd                              |
| n     | Kaempferol                          | 33.2     | 360                             | 286.23          | 285                      | nd                              |

\*The peak numbers are shown as in the Fig. 1.
